# Supplementary material for: The Non-Interventional PAZOREAL Study to Assess the Effectiveness and Safety of Pazopanib in a Real-Life Setting: Reflecting a Changing mRCC Treatment Landscape
Source: MDPI journal article supplement (doi:10.3390/cancers14225486), 2022-11-08
Supplement: s1 [file s1]

# The Non-Interventional PAZOREAL Study to Assess the Effectiveness and Safety of Pazopanib in a Real-Life Setting: Reflecting a Changing mRCC Treatment Landscape

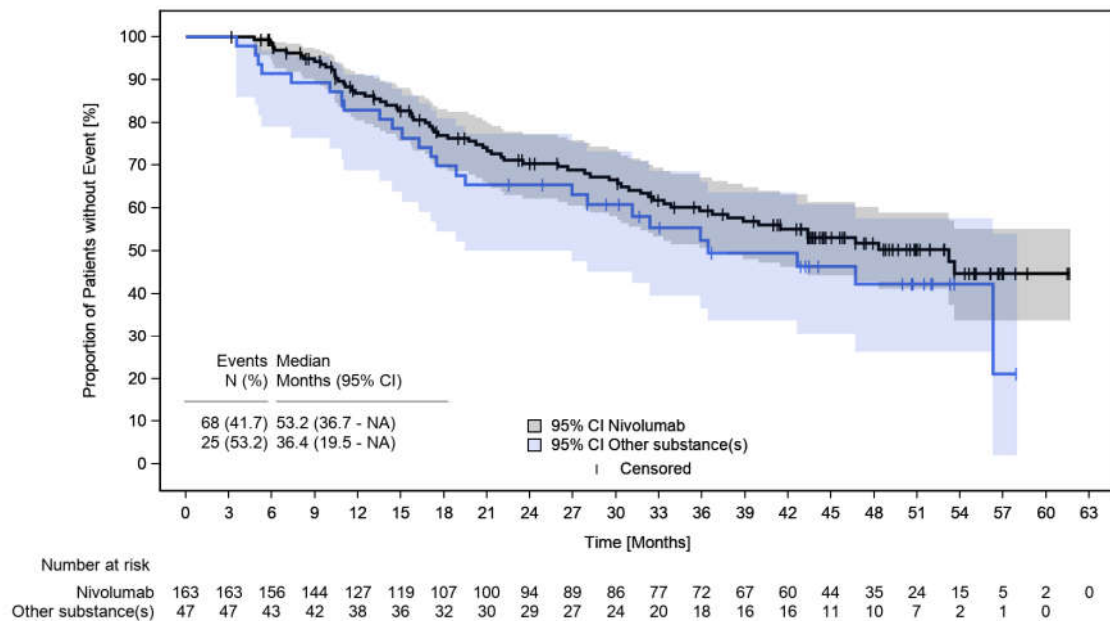

Figure S1. Overall survival of patients treated with nivolumab.

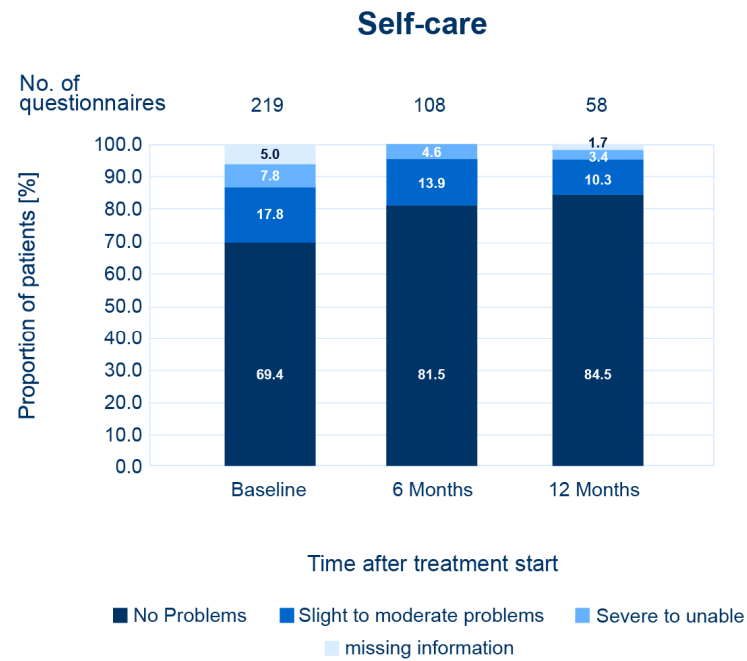

**Figure S2.** Quality of life under pazopanib regarding the dimension “self-care” at baseline and after 6 and 12 months. Percentages refer to the number of returned questionnaires.

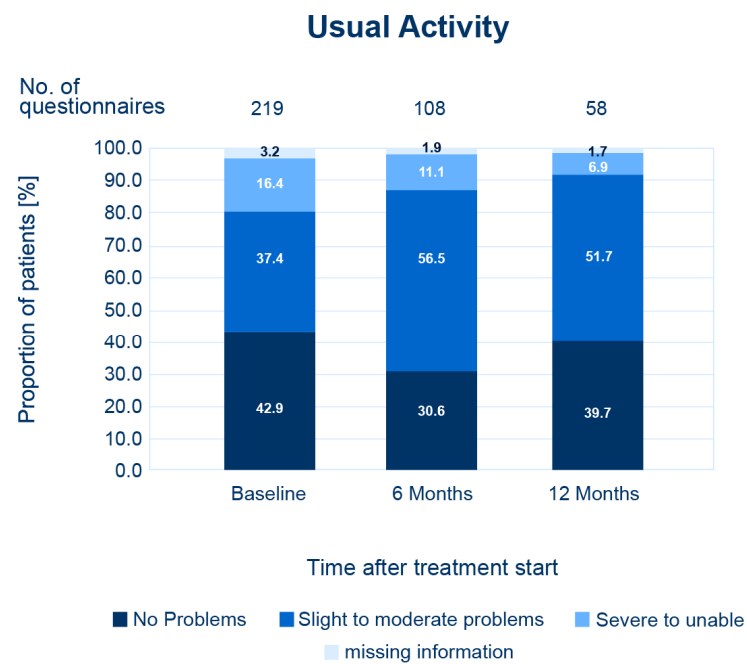

**Figure S3.** Quality of life under pazopanib regarding the dimension “usual activity” at baseline and after 6 and 12 months. Percentages refer to the number of returned questionnaires.

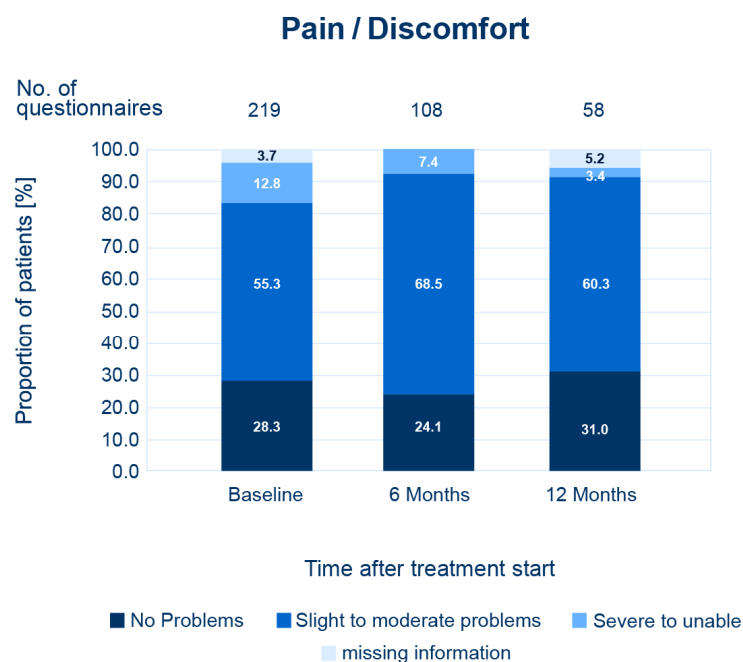

**Figure S4.** Quality of life under pazopanib regarding the dimension “pain / discomfort” at baseline and after 6 and 12 months. Percentages refer to the number of returned questionnaires.

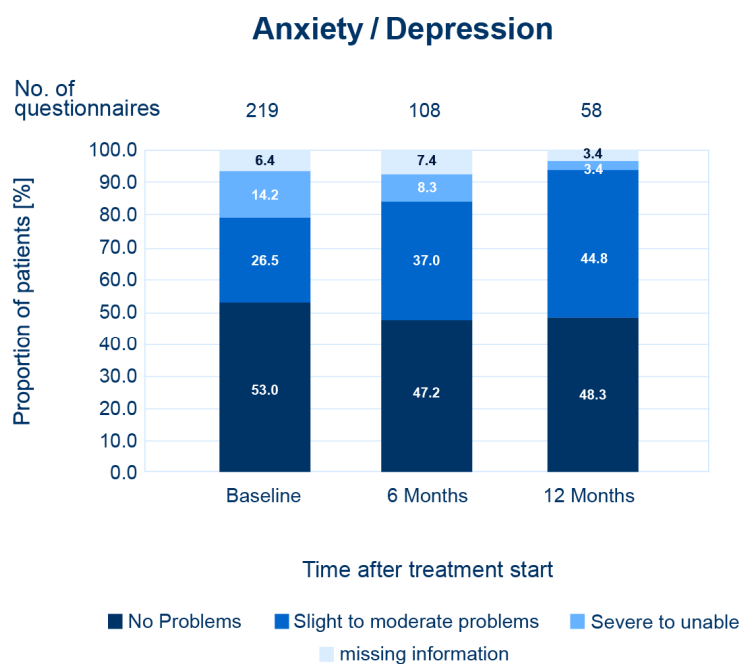

**Figure S5.** Quality of life under pazopanib regarding the dimension “anxiety / depression” at baseline and after 6 and 12 months. Percentages refer to the number of returned questionnaires.

**Table S1.** Main reasons for discontinuation under 2<sup>nd</sup>-line nivolumab.

| <b>Reason for Discontinuation</b>                                                                                                                                                                                                                  | <b>Patients under 2<sup>nd</sup>-line<br/>Nivolumab, <i>n</i> = 143</b> |
|----------------------------------------------------------------------------------------------------------------------------------------------------------------------------------------------------------------------------------------------------|-------------------------------------------------------------------------|
| Progression of the disease, <i>n</i> (%)                                                                                                                                                                                                           | 87 (53.4%)                                                              |
| Therapy-related toxicity, <i>n</i> (%)                                                                                                                                                                                                             | 14 (8.6%)                                                               |
| Death, <i>n</i> (%)                                                                                                                                                                                                                                | 11 (6.7%)                                                               |
| Non-therapy related adverse events (AE) incl. serious AE<br>and other reasons, <i>n</i> (%)                                                                                                                                                        | 7 (4.3%)                                                                |
| Investigator's decision (not toxicity, not therapy-related), <i>n</i><br>(%)                                                                                                                                                                       | 7 (4.3%)                                                                |
| Patient's wish (not toxicity, not therapy-related), <i>n</i> (%)                                                                                                                                                                                   | 7 (4.3%)                                                                |
| Lost to follow-up, <i>n</i> (%)                                                                                                                                                                                                                    | 2 (1.2%)                                                                |
| Non-compliance, <i>n</i> (%)                                                                                                                                                                                                                       | 1 (0.6%)                                                                |
| Other reasons, <i>n</i> (%)                                                                                                                                                                                                                        | 7 (4.3%)                                                                |
| Missing, <i>n</i> (%)                                                                                                                                                                                                                              | 1 (0.7%)                                                                |
| Reasons for discontinuation of the 2 <sup>nd</sup> -line treatment with nivolumab were documented<br>for 143 out of 163 patients (87.7%). For 19 patients (11.7%) treatment with nivolumab<br>was ongoing after the end of the observation period. |                                                                         |

**Table S2.** Time of drug (ToD), best response and disease control rate (DCR) under 2<sup>nd</sup>-line nivolumab.

| Endpoint                                  | Patients under 2nd-line<br>Nivolumab, <i>n</i> =163 |
|-------------------------------------------|-----------------------------------------------------|
| Median ToD, in months (95% CI)            | 4.8 (3.7–6.5)                                       |
| For trial-eligible patients               | 3.9 (3.1–6.7)                                       |
| 6-month ToD-rate, % (95% CI)              | 43.9% (36.1%–51.1%)                                 |
| For trial-eligible patients               | 42.2% (30.0%–53.8%)                                 |
| Best response, <i>n</i> (% [95% CI])      |                                                     |
| Complete response (CR)                    | 10 (6.1% [3.2–11.0])                                |
| Stable disease (SD)                       | 61 (37.4%; [30.4–45.1])                             |
| Progressive disease (PD)                  | 56 (34.4% [27.5–41.9])                              |
| Assessment of best response, <i>n</i> (%) |                                                     |
| Radiologic assessment                     | 110 (67.5%)                                         |
| Clinical assessment                       | 17 (10.4%)                                          |
| No assessment done                        | 36 (22.9%)                                          |
| DCR (patients with CR and SD), % (95% CI) | 43.6% (36.2–51.2)                                   |

**Table S3.** Summary of treatment-emergent adverse events (TEAEs) under 2<sup>nd</sup>-line nivolumab.

| TEAE                                                                        | Patients,<br><i>n</i> =163 | Cases,<br><i>n</i> =400 |
|-----------------------------------------------------------------------------|----------------------------|-------------------------|
| TEAE, <i>n</i> (%)                                                          | 120 (73.6%)                | 400 (100.0%)            |
| TEAE grade 1/2, <i>n</i> (%)                                                | 96 (58.9%)                 |                         |
| Related to nivolumab, <i>n</i> (%)                                          | 40 (24.5%)                 |                         |
| Gastrointestinal disorders                                                  | 14 (8.6%)                  |                         |
| Diarrhea*                                                                   | 9 (5.5%)                   |                         |
| Skin and subcutaneous tissue disorders                                      | 13 (8.0%)                  |                         |
| TEAE grade 3/4, <i>n</i> (%)                                                | 53 (32.5%)                 | 86 (21.5%)              |
| Related to nivolumab                                                        | 23 (14.1%)                 | 28 (7.0%)               |
| TEAE leading to discontinuation of treatment, <i>n</i> (%)                  | 38 (23.3%)                 | 56 (14.0%)              |
| Related to nivolumab <sup>†</sup>                                           | 15 (9.2%)                  | 19 (4.8%)               |
| Fatal TEAE, <i>n</i> (%)                                                    | 22 (13.5%)                 | 22 (5.5%)               |
| Related to nivolumab                                                        | 0 (0.0%)                   | 0 (0.0%)                |
| Adverse event terms were encoded according to MedDRA version 20.0.          |                            |                         |
| *No other related TEAE grade 1/2 occurred in more than 5.0% of patients.    |                            |                         |
| <sup>†</sup> No specific TEAE was reported for more than 2 patients (1.2%). |                            |                         |

**Table S4.** Quality of life under 2<sup>nd</sup>-line nivolumab at baseline and after 6 and 12 months.

| EQ-5D-5L                                                                                                                                                   | Time After Treatment Start |            |            |
|------------------------------------------------------------------------------------------------------------------------------------------------------------|----------------------------|------------|------------|
|                                                                                                                                                            | Baseline                   | 6 months   | 12 months  |
| <b>No. of returned Questionnaires, <i>n</i> (%)<sup>*</sup></b>                                                                                            | 76 (52.1%)                 | 30 (20.6%) | 21 (14.4%) |
| Mobility, <i>n</i> (%)                                                                                                                                     |                            |            |            |
| No problems                                                                                                                                                | 36 (47.4%)                 | 15 (50.0%) | 7 (33.3%)  |
| Slight to moderate problems                                                                                                                                | 22 (28.9%)                 | 8 (26.7%)  | 10 (47.6%) |
| Severe to unable                                                                                                                                           | 12 (15.8%)                 | 5 (16.7%)  | 3 (14.3%)  |
| Missing information                                                                                                                                        | 6 (7.9%)                   | 2 (6.7%)   | 1 (4.8%)   |
| Self-Care, <i>n</i> (%)                                                                                                                                    |                            |            |            |
| No problems                                                                                                                                                | 48 (63.2%)                 | 20 (66.7%) | 13 (61.9%) |
| Slight to moderate problems                                                                                                                                | 22 (28.9%)                 | 7 (23.3%)  | 5 (23.8%)  |
| Severe to unable                                                                                                                                           | 4 (5.3%)                   | 3 (10.0%)  | 2 (9.5%)   |
| Missing information                                                                                                                                        | 2 (2.6%)                   | 0 (0.0%)   | 1 (4.8%)   |
| Usual Activity, <i>n</i> (%)                                                                                                                               |                            |            |            |
| No problems                                                                                                                                                | 23 (30.3%)                 | 10 (33.3%) | 10 (47.6%) |
| Slight to moderate problems                                                                                                                                | 35 (46.1%)                 | 14 (46.7%) | 8 (38.1%)  |
| Severe to unable                                                                                                                                           | 16 (21.1%)                 | 6 (20.0%)  | 3 (14.3%)  |
| Missing information                                                                                                                                        | 2 (2.6%)                   | 0 (0.0%)   | 0 (0.0%)   |
| Pain/Discomfort, <i>n</i> (%)                                                                                                                              |                            |            |            |
| No problems                                                                                                                                                | 22 (28.9%)                 | 8 (26.7%)  | 6 (28.6%)  |
| Slight to moderate problems                                                                                                                                | 37 (48.7%)                 | 17 (56.7%) | 14 (66.7%) |
| Severe to unable                                                                                                                                           | 15 (19.7%)                 | 5 (16.7%)  | 1 (4.8%)   |
| Missing information                                                                                                                                        | 2 (2.6%)                   | 0 (0.0%)   | 0 (0.0%)   |
| Anxiety/Depression, <i>n</i> (%)                                                                                                                           |                            |            |            |
| No problems                                                                                                                                                | 34 (44.7%)                 | 16 (53.3%) | 11 (52.4%) |
| Slight to moderate problems                                                                                                                                | 33 (43.4%)                 | 11 (36.7%) | 7 (33.3%)  |
| Severe to unable                                                                                                                                           | 6 (7.9%)                   | 3 (10.0%)  | 2 (9.5%)   |
| Missing information                                                                                                                                        | 3 (3.9%)                   | 0 (0.0%)   | 1 (4.8%)   |
| *146 patients (89.6%) qualified for the quality of life assessment. Percentages of the EQ-5D-5L dimensions refer to the number of returned questionnaires. |                            |            |            |
